# Supplementary material for: Study on the mechanism of Shugan Lidan Xiaoshi granule in preventing acute pancreatitis based on network pharmacology and molecular docking
Source: PubMed Central journal article supplement — Heliyon. 2024 Mar 6;10(5):e27365. doi: 10.1016/j.heliyon.2024.e27365 (PMC10938120; doi:10.1016/j.heliyon.2024.e27365), 2024-03-06
Supplement: mmc1.pdf [file mmc1.pdf]

Table S1 The content of various Chinese medicinal herbs in SLXG

| NO | Herb                               | Proportion(%) |
|----|------------------------------------|---------------|
| 1  | Bupleuri Radix                     | 8.26          |
| 2  | Chuanxiong Rhizoma                 | 8.26          |
| 3  | Aurantii Fructus                   | 8.26          |
| 4  | Paeoniae Radix Alba                | 8.26          |
| 5  | Glycyrrhizae Radix et Rhizoma      | 4.98          |
| 6  | Lysimachiae Herba                  | 12.4          |
| 7  | Galli Gigerii Endothelium Coreneum | 12.4          |
| 8  | Curcumae Radix                     | 8.26          |
| 9  | Lygodii Spora                      | 8.26          |
| 10 | Artemisiae Scopariae Herba         | 12.4          |
| 11 | Lonicerae Japonicae Flos           | 8.26          |
